# Supplementary material for: Impacts of the Type I Toxin–Antitoxin System, SprG1/SprF1, on Staphylococcus aureus Gene Expression
Source: MDPI journal article supplement (doi:10.3390/genes12050770), 2021-05-18
Supplement: s1 [file s1]

**Supplementary data for**

**Impacts of the type I toxin-antitoxin system, SprG1/SprF1, on *Staphylococcus aureus* gene expression**

Kinga Chlebicka, Emilia Bonar, Piotr Suder, Emeline Ostyn, Brice Felden, Benedykt Wladyka and Marie-Laure Pinel-Marie

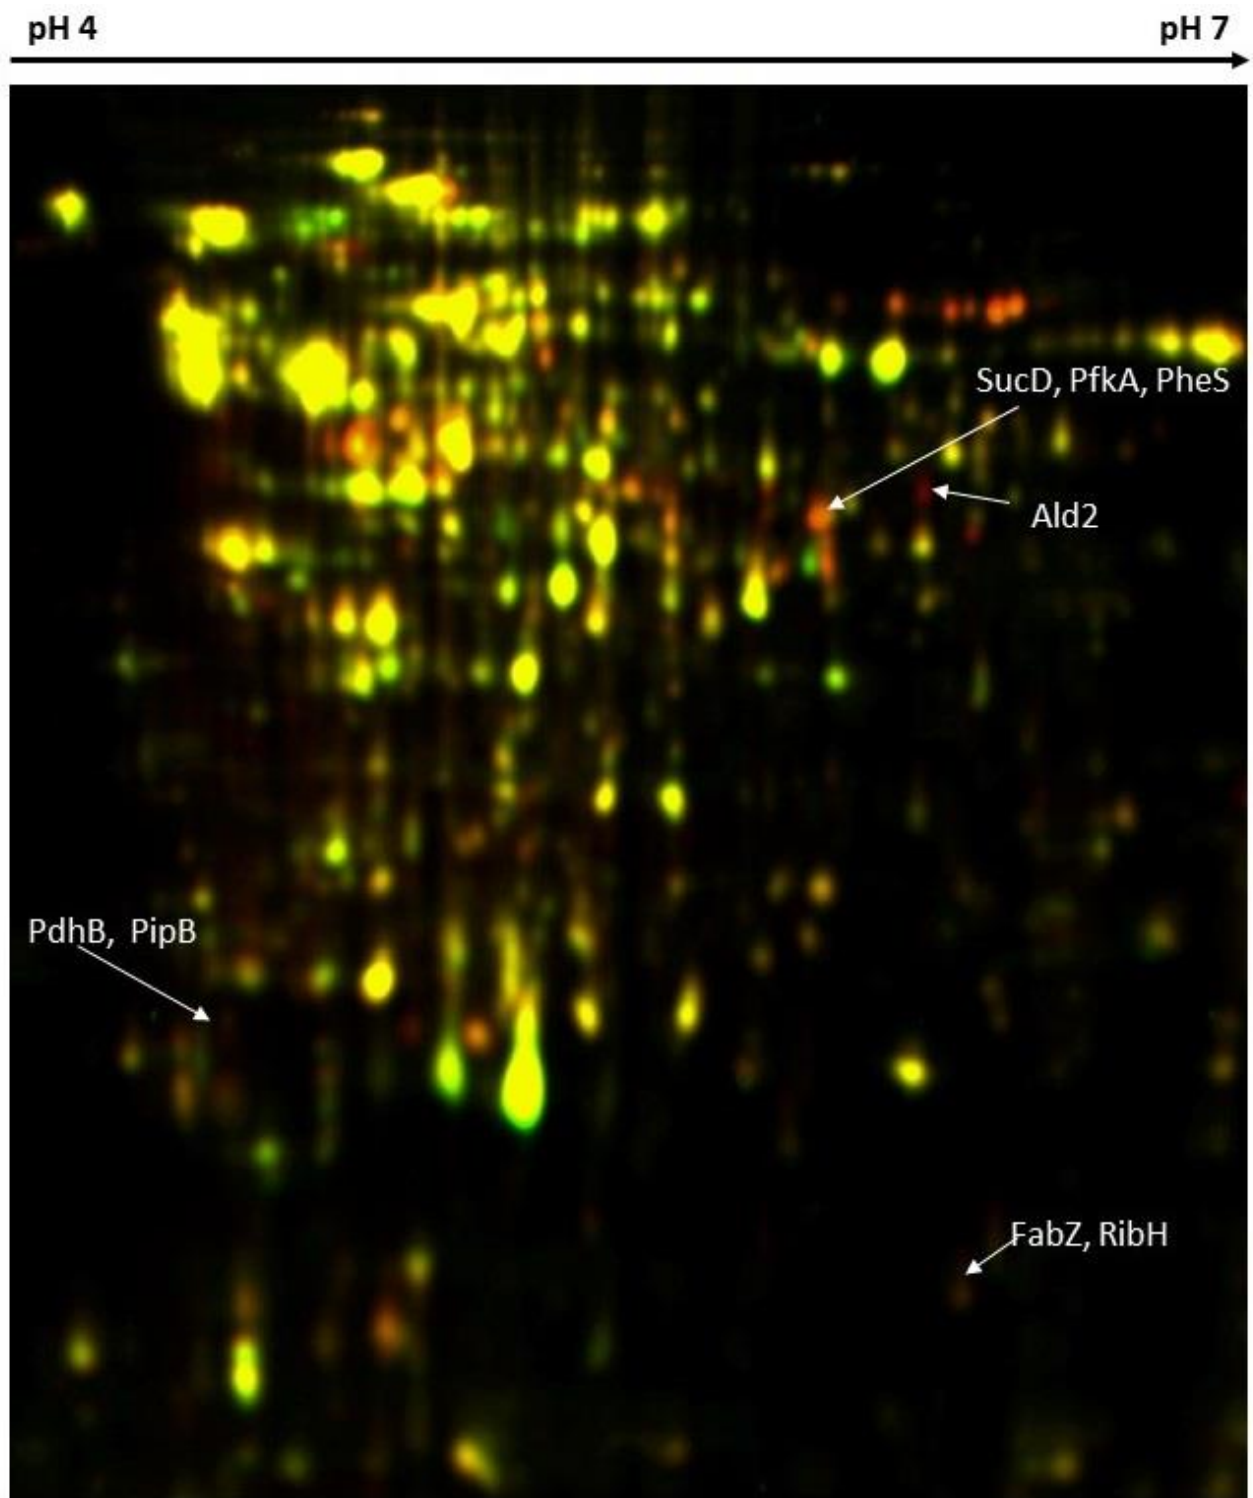

**Supplementary Figure S1.** An exemplary 2D DIGE gel of *S. aureus* N315 and the SprG1/SprF1 TA system deletion mutant, transformed with a plasmid (over)expressing the SprF1 antitoxin, intracellular proteins isolated from stationary growth phase (15 h). Differentiating protein spots are marked with arrows. For the meaning of the protein acronyms, please refer to Table 2.

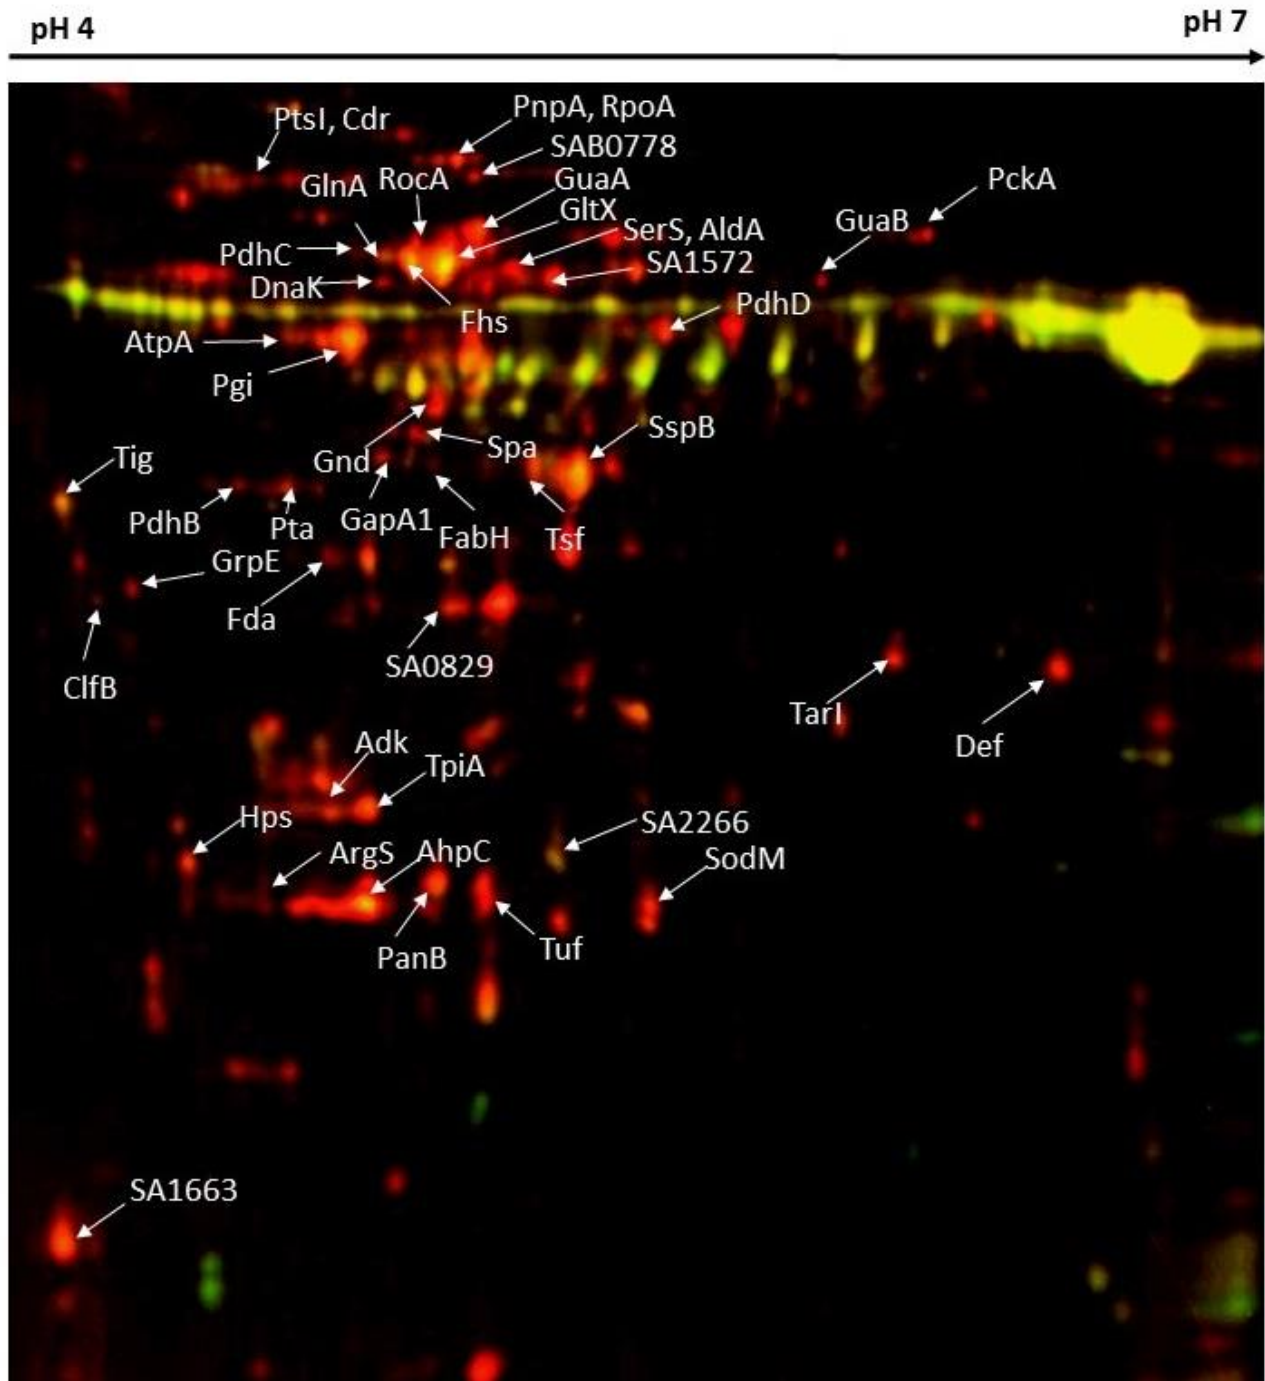

**Supplementary Figure S2.** An exemplary 2D DIGE gel of *S. aureus* N315 and the SprG1/SprF1 TA system deletion mutant, transformed with a plasmid (over)expressing the SprF1 antitoxin, extracellular proteins isolated from stationary growth phase (15 h). Differentiating protein spots are marked with arrows. For the meaning of the protein acronyms, please refer to Table 3.

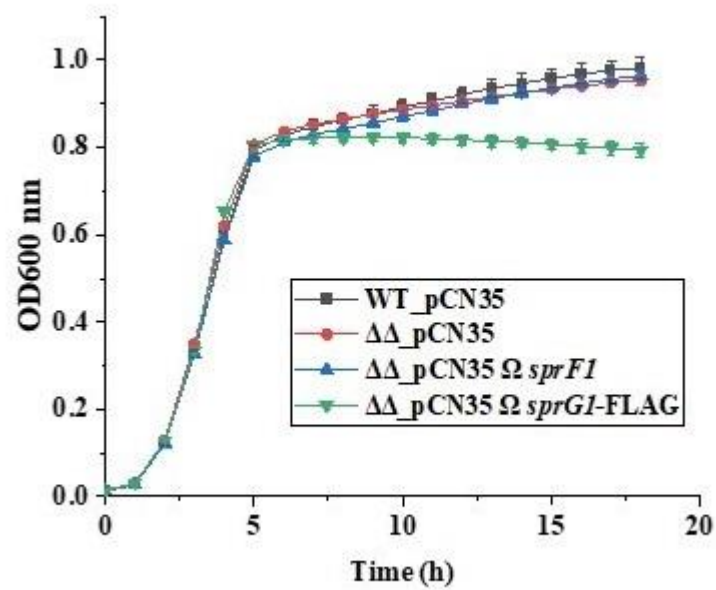

**Supplementary Figure S3.** Growth curves of *S. aureus* N315 (WT) and the *sprG1/sprF1* deletion mutant ( $\Delta\Delta$ ) transformed with the control plasmid (pCN35), the plasmid (pCN35 $\Omega$ *sprF1*) expressing SprF1 antitoxin under the control of its native promoter or the plasmid (pCN35 $\Omega$ *sprG1*-FLAG) expressing the flagged version of SprG1 toxin, cultivated in optimal conditions (Tryptic Soy Broth, 37 °C)

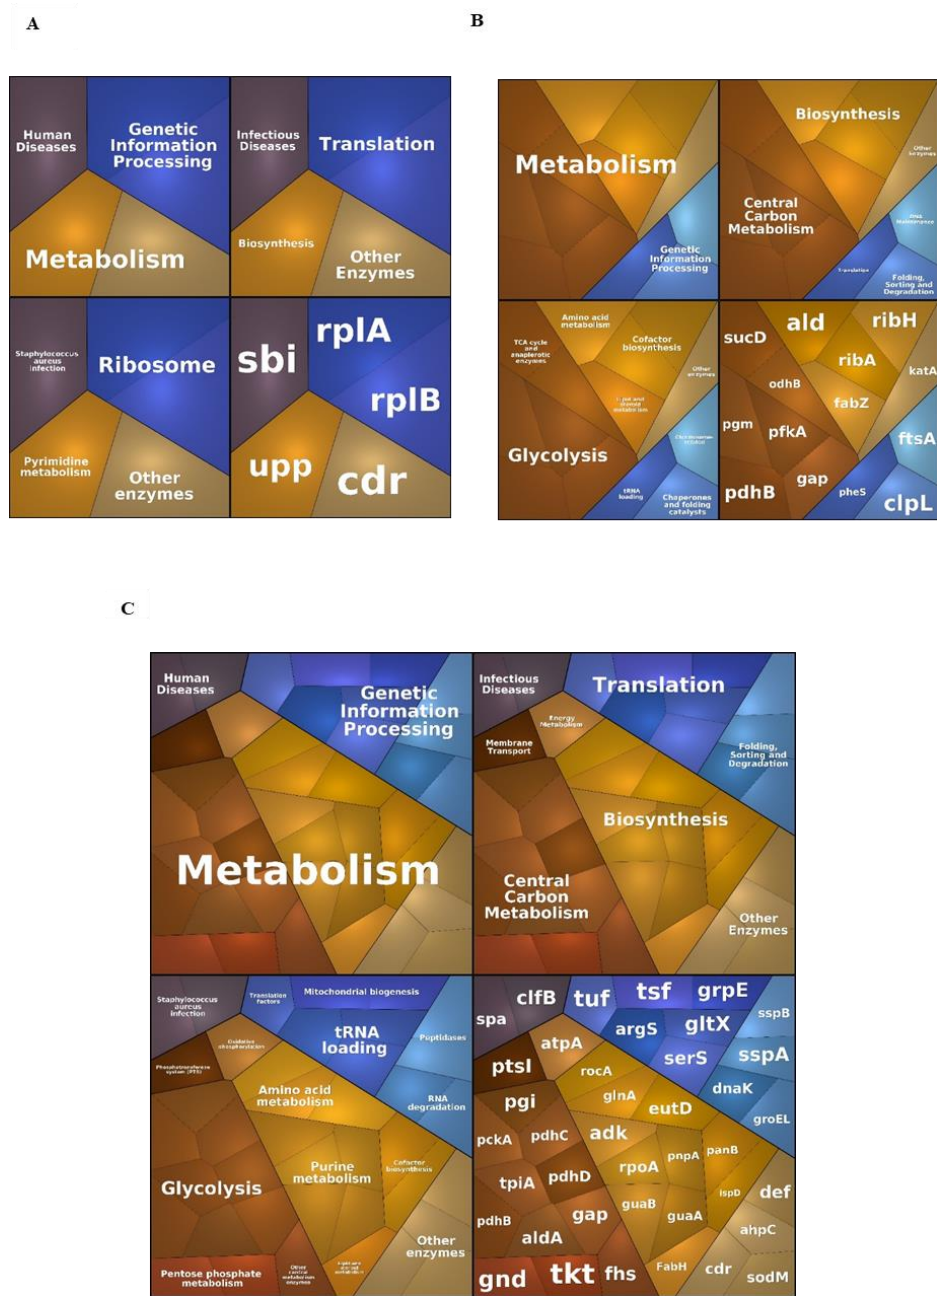

**Supplementary Figure S4.** Voronoi diagrams illustrating functions of differentially expressed proteins identified in proteomic studies. (A) and (B) intracellular proteomes at logarithmic and stationary growth phases, respectively. (C) The extracellular proteome at stationary phase. The diagrams were prepared using interactive proteomaps (available at [www.proteomaps.net](http://www.proteomaps.net); Liebermeister W, Noor E, Flamholz A, Davidi D, Bernhardt J, and Milo R, Visual account of protein investment in cellular functions. PNAS June 10, 2014 111 (23) 8488-8493).

**Supplementary Table S1.** A list of differentially expressed proteins extracted from proteomic comparisons of *S. aureus* N315 with its deletion mutant of SprG1/SprF1 TA system and with the (over)expression of SprF1 antitoxin – see the excel file: Supplementary Table\_1.xlsx

**Supplementary Table S2.** SprF1 (sRNA) interactions with *S. aureus* N315 gene transcript predicted by the TargetRNA2 algorithm (TargetRNA2: identifying targets of small regulatory RNAs in bacteria. Mary Beth Kery, Monica Feldman, Jonathan Livny, and Brian Tjaden. Nucleic Acids Research, 42(W1): W124-W129, 2014).

| Rank | Gene         | Synonym | Energy | P_values | sRNA_start | sRNA_stop | mRNA_start | mRNA_stop |
|------|--------------|---------|--------|----------|------------|-----------|------------|-----------|
| 1    | -            | SA0971  | -18.24 | 0.000    | 13         | 27        | -76        | -62       |
| 2    | <i>lytS</i>  | SA0250  | -13.49 | 0.003    | 120        | 133       | 2          | 15        |
| 3    | -            | SA0270  | -13.26 | 0.003    | 88         | 105       | -17        | 2         |
| 4    | -            | SA2179  | -11.20 | 0.012    | 59         | 78        | -3         | 17        |
| 5    | -            | SA0517  | -10.77 | 0.016    | 61         | 75        | 9          | 20        |
| 6    | <i>aldH</i>  | SA1736  | -10.37 | 0.019    | 41         | 55        | -72        | -60       |
| 7    | <i>cfxE</i>  | SA1065  | -10.00 | 0.023    | 21         | 29        | -72        | -64       |
| 8    | <i>set12</i> | SA0388  | -9.93  | 0.024    | 10         | 19        | -79        | -70       |
| 9    | <i>acpS</i>  | SA1875  | -9.75  | 0.026    | 96         | 109       | -55        | -42       |
| 10   | <i>asnC</i>  | SA1287  | -9.39  | 0.031    | 90         | 105       | -12        | 3         |
| 11   | <i>menE</i>  | SA1615  | -9.36  | 0.032    | 122        | 136       | -68        | -54       |
| 12   | <i>splF</i>  | SA1627  | -9.11  | 0.035    | 127        | 141       | 6          | 20        |
| 13   | -            | SA0524  | -9.03  | 0.037    | 49         | 64        | -64        | -49       |
| 14   | -            | SA1764  | -9.01  | 0.037    | 94         | 109       | -48        | -33       |
| 15   | -            | SA2123  | -8.98  | 0.038    | 128        | 141       | -73        | -60       |
| 16   | -            | SA0224  | -8.88  | 0.039    | 59         | 74        | -69        | -54       |
| 17   | -            | SA0815  | -8.81  | 0.040    | 119        | 130       | -1         | 11        |
| 18   | -            | SA0116  | -8.68  | 0.043    | 120        | 134       | -63        | -49       |
| 19   | -            | SA0286  | -8.43  | 0.047    | 29         | 41        | -11        | 4         |
| 20   | <i>ddh</i>   | SA2312  | -8.36  | 0.049    | 72         | 86        | 7          | 20        |
| 21   | -            | SA0860  | -8.34  | 0.049    | 111        | 119       | -21        | -13       |
| 22   | -            | SA0268  | -8.32  | 0.049    | 95         | 108       | -11        | 4         |
| 23   | -            | SA1778  | -8.30  | 0.050    | 126        | 137       | -28        | -17       |

SA0971 (conserved hypothetical protein)  
sRNA 27 3' ACGCGUACAACGGGA 5' 13  
|||||||::|  
SA0971 -76 5' CGCGCAUGUUGUUCA 3' -62

lytS (Sensor histidine kinase/phosphatase LytS)  
sRNA 133 3' UUGGUAGCGAUUGA 5' 120  
::|:|||||||  
lytS 2 5' UGCUAUCGCUAACA 3' 15

SA0270 (similar to secretory antigen precursor SsaA)  
sRNA 105 3' ACC-AAUUUACCAAUAAU 5' 88  
|| |||||||||  
SA0270 -17 5' AGGAUUAAAUGGUUUAU 3' 2

SA2179 (Oxygen regulatory protein NreC)

|        |    |    |                      |    |    |
|--------|----|----|----------------------|----|----|
| sRNA   | 78 | 3' | AUUAGAUUUUAUCGGUGGCA | 5' | 59 |
|        |    |    | :      :   :         |    |    |
| SA2179 | -3 | 5' | AAAUUGAAAAUAGUCAUUGC | 3' | 17 |

SA0517 (Cof-type HAD-IIB family hydrolase)

|        |    |    |                 |    |    |
|--------|----|----|-----------------|----|----|
| sRNA   | 75 | 3' | AGAUUUUAUCGGUGG | 5' | 61 |
|        |    |    |                 |    |    |
| SA0517 | 9  | 5' | ACU--AAUAGCCA-C | 3' | 20 |

aldH (Aldehyde dehydrogenase)

|      |     |    |                 |    |     |
|------|-----|----|-----------------|----|-----|
| sRNA | 55  | 3' | AAAUUGCCCGAGUGA | 5' | 41  |
|      |     |    |                 |    |     |
| aldH | -72 | 5' | AUUAAC-GGC-CACA | 3' | -60 |

cfxE (Ribulose-5-phosphate 3-epimerase homolog)

|      |     |    |           |    |     |
|------|-----|----|-----------|----|-----|
| sRNA | 29  | 3' | AAACGCGUA | 5' | 21  |
|      |     |    |           |    |     |
| cfxE | -72 | 5' | AUUGCGCAA | 3' | -64 |

set12 (Superantigen-like protein SSL8)

|       |     |    |            |    |     |
|-------|-----|----|------------|----|-----|
| sRNA  | 19  | 3' | AACGGGAAAA | 5' | 10  |
|       |     |    |            |    |     |
| set12 | -79 | 5' | AUGCCCUUUA | 3' | -70 |

acpS (Holo-[acyl-carrier-protein] synthase)

|      |     |    |                |    |     |
|------|-----|----|----------------|----|-----|
| sRNA | 109 | 3' | AGCUACCAAUUUAC | 5' | 96  |
|      |     |    |                |    |     |
| acpS | -55 | 5' | ACGAUGGUUAAAUA | 3' | -42 |

asnC (Asparagine--tRNA ligase)

|      |     |    |                  |    |    |
|------|-----|----|------------------|----|----|
| sRNA | 105 | 3' | ACCAUUUACCAUAA   | 5' | 90 |
|      |     |    | :                |    |    |
| asnC | -12 | 5' | AGG-AGAAUGGUUAUG | 3' | 3  |

menE (2-succinylbenzoate--CoA ligase)

|      |     |    |                 |    |     |
|------|-----|----|-----------------|----|-----|
| sRNA | 136 | 3' | AUAUUGGUAGCGAUU | 5' | 122 |
|      |     |    | :    :          |    |     |
| menE | -68 | 5' | CAUAACCACUGCUAG | 3' | -54 |

splF (Serine protease SplF)

|      |     |    |                 |    |     |
|------|-----|----|-----------------|----|-----|
| sRNA | 141 | 3' | UUUUUAUAUUGGUAG | 5' | 127 |
|      |     |    | :               |    |     |
| splF | 6   | 5' | AAAAUAUAUAUCAU- | 3' | 20  |

SA0524 (GTP cyclohydrolase)

|        |     |    |                  |    |     |
|--------|-----|----|------------------|----|-----|
| sRNA   | 64  | 3' | GUGGCAGAAAAAUUGC | 5' | 49  |
|        |     |    |                  |    |     |
| SA0524 | -64 | 5' | CACAG-CUUUUUACAA | 3' | -49 |

SA1764 (Phage minor structural protein)

|        |     |    |                 |    |     |
|--------|-----|----|-----------------|----|-----|
| sRNA   | 109 | 3' | AGCUACCAUUUACCA | 5' | 94  |
|        |     |    |                 |    |     |
| SA1764 | -48 | 5' | ACGACGGUAAAUGGC | 3' | -33 |

SA2123 (Transcription regulator LysR family)

|        |     |    |                |    |     |
|--------|-----|----|----------------|----|-----|
| sRNA   | 141 | 3' | UUUUUAUAUUGGUA | 5' | 128 |
|        |     |    | :              |    |     |
| SA2123 | -73 | 5' | UAAAAUAUAGCCAA | 3' | -60 |

SA0224 (6-phosphogluconate dehydrogenase, decarboxylating)

|        |     |    |                    |    |     |
|--------|-----|----|--------------------|----|-----|
| sRNA   | 74  | 3' | GAUUUUAUUCGGUGGC-A | 5' | 59  |
|        |     |    |                    |    |     |
| SA0224 | -69 | 5' | AUAAAAUAG-CAACGUU  | 3' | -54 |

SA0815 (Peptidyl-prolyl cis-trans isomerase, PPIase)

|        |     |    |              |    |     |
|--------|-----|----|--------------|----|-----|
| sRNA   | 130 | 3' | GUAGCGAUUGAA | 5' | 119 |
|        |     |    |              |    |     |
| SA0815 | -1  | 5' | AAUGGCUAACUA | 3' | 11  |

SA0116 (Siderophore biosynthesis protein SbnE)

|        |     |    |                 |    |     |
|--------|-----|----|-----------------|----|-----|
| sRNA   | 134 | 3' | AUUGGUAGCGAUUGA | 5' | 120 |
|        |     |    | :               |    |     |
| SA0116 | -63 | 5' | CAACCAUCACUAAUC | 3' | -49 |

SA0286 (TIGR01741 family protein)

|        |     |    |                 |    |    |
|--------|-----|----|-----------------|----|----|
| sRNA   | 41  | 3' | AUCC-C-AUUGUACA | 5' | 29 |
|        |     |    | :               |    |    |
| SA0286 | -11 | 5' | GGGGCGUAACAUGA  | 3' | 4  |

ddh (D-lactate dehydrogenase)

|      |    |    |                 |    |    |
|------|----|----|-----------------|----|----|
| sRNA | 86 | 3' | AAUUAGAAAUAGAU  | 5' | 72 |
|      |    |    | :               |    |    |
| ddh  | 7  | 5' | AUAAUCUUUAAUUU- | 3' | 20 |

SA0860 (ClpXP adapter protein SpxH)

|        |     |    |              |    |     |
|--------|-----|----|--------------|----|-----|
| sRNA   | 137 | 3' | UAUAUUGGUAGC | 5' | 126 |
|        |     |    | :            |    |     |
| SA1778 | -28 | 5' | UUAUAACCAUUU | 3' | -17 |

Parameters for TargetRNA2 algorithm (<http://cs.wellesley.edu/~btjaden/TargetRNA2/index.html>):

|                         |                                                            |
|-------------------------|------------------------------------------------------------|
| TargetRNA version:      | 2.01                                                       |
| Replicon:               | <i>Staphylococcus aureus</i> subsp. aureus N315 chromosome |
| NTs before start codon: | 80                                                         |
| NTs after start codon:  | 20                                                         |



Seed length: 7  
sRNA conservation and accessibility: true  
sRNA window size: 13  
mRNA structural accessibility: true  
Interaction region: 20  
Filter size: 400  
Single target: -  
File of candidate targets: -  
p-value: 0.05

sRNA: SprF1 RNA antisense

```
>SprF1
AUAUAUAGAAAAAGGGCAACAUGCGCAAACAUGUUACCCUAGUGAGCCCGUUAAAAAGACGGUGGCU
AUUUUAGAUUAAAGAUUAAAUUAAUAACCAUUUAACCAUCGAAACCAGCCAAAGUUAGCGAUGGUUA
UAUUUUU
```
